# Supplementary material
Source: PubMed Central journal article supplement (PMC7210252)
Supplement: 42003_2020_945_MOESM4_ESM.pdf [file 42003_2020_945_MOESM4_ESM.pdf]

## Description of Additional Supplementary Files

**File Name:** **Supplementary Data 1**

**Description:** an Excel file that contains all the numerical values in the main figures from our simulations.
